# Supplementary material
Source: Elsevier journal article supplement (https://www.sciencedirect.com/science/article/pii/S157518132030156X)
Supplement: mmc1 [file S157518132030156X:mmc1.pdf]

# Anexo 1

## Test de conocimientos sobre calidad sanitaria

|           |                                                                                                                                                                                                                                                                                                                                                                                                                                                                                                                                                                                                                                                              |
|-----------|--------------------------------------------------------------------------------------------------------------------------------------------------------------------------------------------------------------------------------------------------------------------------------------------------------------------------------------------------------------------------------------------------------------------------------------------------------------------------------------------------------------------------------------------------------------------------------------------------------------------------------------------------------------|
| <b>1</b>  | La Organización Mundial de la Salud recomienda la higiene de manos como una actuación esencial para evitar las infecciones relacionadas con la asistencia sanitaria. ¿Cuál es el porcentaje de cumplimiento de la higiene de manos a nivel Internacional/en España/en MC Mutual?<br>a) 50/40/60 por ciento<br>b) 100/90/80 por ciento<br>c) 30/40/60 por ciento<br>d) 70/60/40 por ciento                                                                                                                                                                                                                                                                    |
| <b>2</b>  | Al notificar un incidente sanitario en la plataforma Sistema de Notificación de Eventos Adversos este se remite para su análisis a:<br>a) Comité Deontológico<br>b) Unidad Funcional de Gestión del riesgo<br>c) Comité de Buenas prácticas<br>d) Ninguna de las anteriores                                                                                                                                                                                                                                                                                                                                                                                  |
| <b>3</b>  | Una parada cardiorrespiratoria en un centro asistencial conlleva un momento de tensión máxima. ¿Qué respuesta es la más adecuada?<br>a) Soporte vital básico en superficie dura/avisar 112/Colocación palas Desfibrilador/ Soporte Ventilatorio<br>b) Avisar 112/Soporte vital básico/Soporte ventilatorio/colocación palas desfibrilador<br>c) Colocar paciente en superficie dura/Iniciar maniobras reanimación cardiopulmonar/ colocación palas desfibrilador/Soporte ventilatorio/Avisar 112<br>d) Todas son correctas                                                                                                                                   |
| <b>4</b>  | La medicina apropiada (Right Care) utiliza la revisión de la práctica clínica para acreditar que se hace lo adecuado (Ni más ni menos) y en el momento adecuado (ni antes ni después). ¿Cuál de las siguientes prácticas sanitarias en nuestra organización merecen ser revisadas con atención?<br>a) La realización de Resonancia Magnética en la lumbalgia que se practica a los 12 días.<br>b) El tratamiento analgésico de la lumbalgia realizado con analgésicos no esteroideos y corticoides sistémicos.<br>c) La Radiología simple realizada en todos los casos de dolor lumbar agudo<br>d) Convendría revisar todas las prácticas sanitarias citadas |
| <b>5</b>  | Nuestra mutua dispone de un Mapa de Riesgos que concreta las actuaciones que pueden conllevar un riesgo para los pacientes. ¿Cuál de las siguientes actuaciones está considerada en el mapa de riesgos de nuestra organización?<br>a) Conciliación de la medicación de los pacientes<br>b) Derivación del paciente a otro centro o clínica<br>c) Tratamiento rehabilitador y el equipamiento utilizado<br>d) Todas las mencionadas son actuaciones contempladas en el Mapa de Riesgos                                                                                                                                                                        |
| <b>6</b>  | La satisfacción y buena experiencia de los pacientes es un aspecto clave de la calidad sanitaria. ¿Cuál de las actuaciones que se mencionan influyen positivamente en la opinión de los pacientes?<br>a) Informar adecuadamente y con mensajes homogéneos<br>b) Implicar al paciente en la toma de decisiones sanitarias<br>c) Potenciar la educación en el autocuidado y la autonomía de la persona<br>d) Todas las actuaciones mencionadas influyen positivamente en el paciente                                                                                                                                                                           |
| <b>7</b>  | La plataforma SNEA es una plataforma informática en la que se declaran los incidentes relacionados con la atención sanitaria. ¿Dónde nace esta iniciativa?<br>a) En la OMS crea estos programas en 2008<br>b) En la Alianza por la Seguridad del paciente en el año 2000<br>c) El informe "To Err is Human" del Institute of Medicine de 1999<br>d) De John Sulston, Premio Nobel de Medicina 2002                                                                                                                                                                                                                                                           |
| <b>8</b>  | Los indicadores de calidad sanitaria son el resultado numérico de la explotación de:<br>a) Los informes clínicos de alta o de pruebas complementarias<br>b) La historia clínica del paciente<br>c) Los registros de actividades realizadas<br>d) Las distintas fuentes mencionadas                                                                                                                                                                                                                                                                                                                                                                           |
| <b>9</b>  | En España se realizaron dos macroestudios sobre los incidentes producidos en la atención sanitaria en Hospitales (2005) y Atención Primaria (2007). Los incidentes más frecuentes detectados se relacionan con:<br>a) Equipamiento médico<br>b) Medicamentos<br>c) Diagnóstico médico<br>d) Todos los mencionados eran igualmente frecuentes                                                                                                                                                                                                                                                                                                                 |
| <b>10</b> | ¿Cuál es la medida más importante para evitar las infecciones relacionadas con la atención sanitaria en nuestros centros asistenciales?<br>a) Higiene de manos<br>b) Uso preventivo de antibióticos<br>c) Uso de guantes                                                                                                                                                                                                                                                                                                                                                                                                                                     |

|           |                                                                                                                                                                                                                                                                                                                                                                                                                                                                                                                                       |
|-----------|---------------------------------------------------------------------------------------------------------------------------------------------------------------------------------------------------------------------------------------------------------------------------------------------------------------------------------------------------------------------------------------------------------------------------------------------------------------------------------------------------------------------------------------|
|           | d) Todas las medidas son igualmente importantes                                                                                                                                                                                                                                                                                                                                                                                                                                                                                       |
| <b>11</b> | <p>En el manejo del dolor lumbar agudo, la pauta a seguir según los protocolos clínicos es:</p> <ul style="list-style-type: none"> <li>a) Determinar el dolor siguiendo la escala EVA y pautar tratamiento analgésico con AINES y corticoides sistémicos</li> <li>b) Pautar tratamiento analgésico con AINES según tolerancia</li> <li>c) Determinar el dolor siguiendo la escala EVA y pautar tratamiento analgésico con AINES y/o opioides menores según escala</li> <li>d) Pautar tratamiento con Paracetamol a demanda</li> </ul> |
| <b>12</b> | <p>Las caídas de pacientes en nuestros centros asistenciales se relacionan con:</p> <ul style="list-style-type: none"> <li>a) Antecedentes de caídas</li> <li>b) Movilidad limitada</li> <li>c) Suelo mojado</li> <li>d) Todas las condiciones citadas son ciertas</li> </ul>                                                                                                                                                                                                                                                         |
| <b>13</b> | <p>Las notificaciones de incidentes en los centros sanitarios son siempre voluntarias y tratadas anónimamente. ¿Qué factores provocan el aumento de los incidentes notificados?</p> <ul style="list-style-type: none"> <li>a) Normativas y procedimientos</li> <li>b) Cultura profesional</li> <li>c) Incidencia de errores</li> <li>d) Premios para la declaración</li> </ul>                                                                                                                                                        |
| <b>14</b> | <p>¿Cuáles son los errores relacionados con los Medicamentos en los centros asistenciales?</p> <ul style="list-style-type: none"> <li>a) Reacciones adversas /Incidentes relacionados con la prescripción</li> <li>b) Reacciones adversas/Incidentes relacionados con la administración</li> <li>c) Falta de adherencia/Interacciones medicamentosas</li> <li>d) Reacciones alérgicas/Cambios de tratamiento</li> </ul>                                                                                                               |
| <b>15</b> | <p>¿De todas las infecciones relacionadas con la atención sanitaria que porcentaje se produce en los centros asistenciales y en la atención hospitalaria?</p> <ul style="list-style-type: none"> <li>a) 1/99</li> <li>b) 10/90</li> <li>c) 30/70</li> <li>d) 50/50</li> </ul>                                                                                                                                                                                                                                                         |

## Anexo 2

### Cuestionario de valoración de impacto a los CAS:

|                                                                                                                                                                                                        |
|--------------------------------------------------------------------------------------------------------------------------------------------------------------------------------------------------------|
| 1) ¿Has <b>aplicado</b> a tu práctica como referente de calidad sanitaria o como profesional sanitario alguno de los conocimientos adquiridos en la sesión formativa?                                  |
| <ul style="list-style-type: none"><li>• No, ninguno</li><li>• No aún, lo estoy valorando</li><li>• Sí, me ha ayudado a identificar nuevos objetivos y prácticas</li><li>• Sí, en gran medida</li></ul> |
| 2) ¿Has <b>modificado</b> tu práctica como referente de calidad sanitaria o como profesional sanitario a partir de lo estudiado en la sesión formativa?                                                |
| <ul style="list-style-type: none"><li>• No, todavía no</li><li>• No, pero estoy valorando cómo</li><li>• Sí, en alguna medida he modificado cosas</li><li>• Sí, he modificado diversas cosas</li></ul> |

### Cuestionario de valoración de impacto a los DUG:

|                                                                                                                                                                                                                                         |
|-----------------------------------------------------------------------------------------------------------------------------------------------------------------------------------------------------------------------------------------|
| 1) ¿Piensas que tu referente de calidad sanitaria ha <b>aplicado</b> alguno de los conocimientos adquiridos en la sesión formativa comentada?                                                                                           |
| <ul style="list-style-type: none"><li>• No, ninguno</li><li>• No, pero creo que lo está valorando</li><li>• Sí, se han hecho propuestas</li><li>• Sí, se están aplicando algunas propuestas</li></ul>                                   |
| 2) ¿Piensas que tu referente de calidad sanitaria ha <b>modificado</b> su práctica a partir de lo estudiado en la sesión formativa comentada?                                                                                           |
| <ul style="list-style-type: none"><li>• No, creo que no ha habido ninguna modificación</li><li>• No, pero creo que lo está valorando</li><li>• Sí, lo noto en alguna medida</li><li>• Sí, pienso que se han producido cambios</li></ul> |
